# Supplementary material
Source: Springer Nature journal article supplement (https://www.springermedizin.de/resource/supplementary/12936_2011_1817_MOESM7_ESM.pdf/9541826)
Supplement: MOESM7 [file 9541826]

| <i>Primary Health Care<br/>Period</i> | <i>Colour code</i> | <i>Number of papers<br/>n (%)</i> |
|---------------------------------------|--------------------|-----------------------------------|
| <b>Period 1</b><br>(pre 1950s - 1978) | Grey               | 10 (16.7%)                        |
| <b>Period 2</b><br>(1978 - 1982)      | Green              | 5 (8.3%)                          |
| <b>Period 3</b><br>(1982 - 2000)      | Yellow             | 30 (50%)                          |
| <b>Period 4</b><br>(2000 => )         | Red                | 15 (25%)                          |
